# Supplementary material for: Transcription analysis of neonicotinoid resistance in Mediterranean (MED) populations of B. tabaci reveal novel cytochrome P450s, but no nAChR mutations associated with the phenotype
Source: PubMed Central journal article supplement (PMC4647701; doi:10.1186/s12864-015-2161-5), 2015-11-14

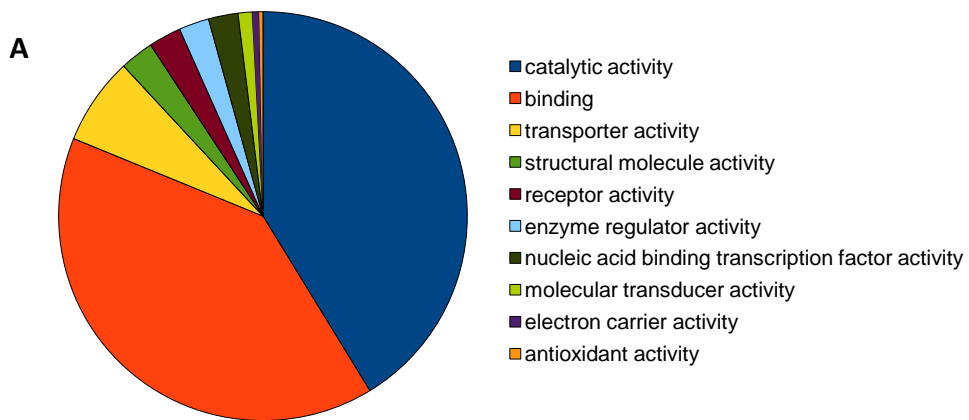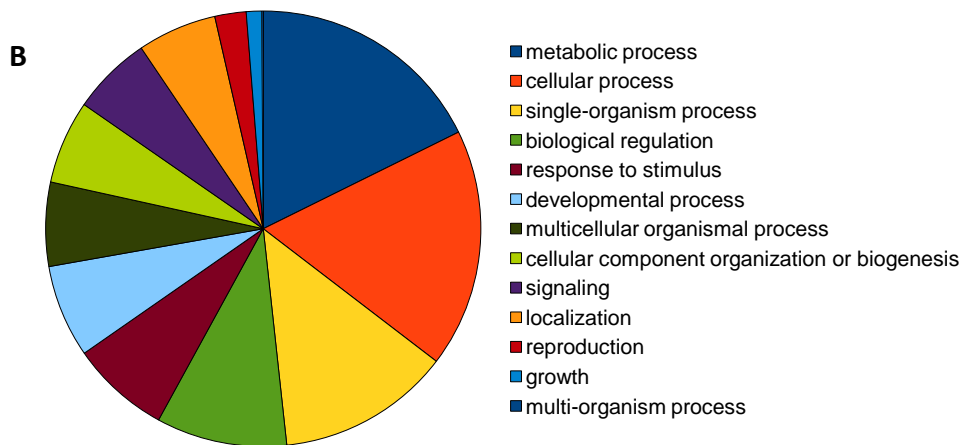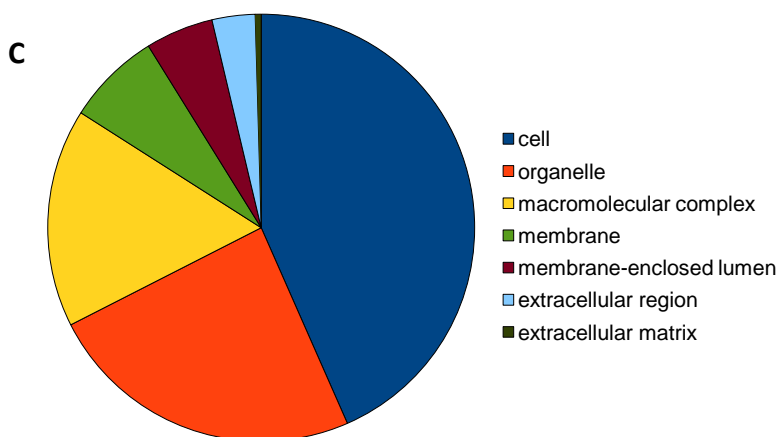

Supplement: 12864_2015_2161_MOESM3_ESM.pdf [file 12864_2015_2161_MOESM3_ESM.pdf]
