# Supplementary material for: Transcription analysis of neonicotinoid resistance in Mediterranean (MED) populations of B. tabaci reveal novel cytochrome P450s, but no nAChR mutations associated with the phenotype
Source: PubMed Central journal article supplement (PMC4647701; doi:10.1186/s12864-015-2161-5), 2015-11-14
Supplement: 12864_2015_2161_MOESM6_ESM.pdf [file 12864_2015_2161_MOESM6_ESM.pdf]

N-terminal signal peptide

12(F/S)
10 20 30 40 50 60 70 80 90 100
D\_a1
Btab\_a1
Btab\_a2
Btab\_a3
Btab\_a4
Btab\_a5
Btab\_a6
Btab\_a7
Btab\_a8
Btab\_b1
Btab\_b2

LpD LpA LpE
110 120 130 140 150 160 170 180 190 200
D\_a1
Btab\_a1
Btab\_a2
Btab\_a3
Btab\_a4
Btab\_a5
Btab\_a6
Btab\_a7
Btab\_a8
Btab\_b1
Btab\_b2

LpB LpB-C LpF LpC TM1
210 220 230 240 250 260 270 280 290 300
D\_a1
Btab\_a1
Btab\_a2
Btab\_a3
Btab\_a4
Btab\_a5
Btab\_a6
Btab\_a7
Btab\_a8
Btab\_b1
Btab\_b2

TM1 TM2 TM3
310 320 330 340 350 360 370 380 390 400
D\_a1
Btab\_a1
Btab\_a2
Btab\_a3
Btab\_a4
Btab\_a5
Btab\_a6
Btab\_a7
Btab\_a8
Btab\_b1
Btab\_b2
